# Supplementary material for: Enhanced heavy metal removal from produced water using metal-incorporated iron oxyhydroxide (FeO(OH)) nanomaterials: adsorption kinetics and isotherm studies
Source: Royal Society of Chemistry journal article supplement (doi:10.1039/d6ra03786k), 2026-05-21
Supplement: d6ra03786k1.pdf [file d6ra03786k1.pdf]

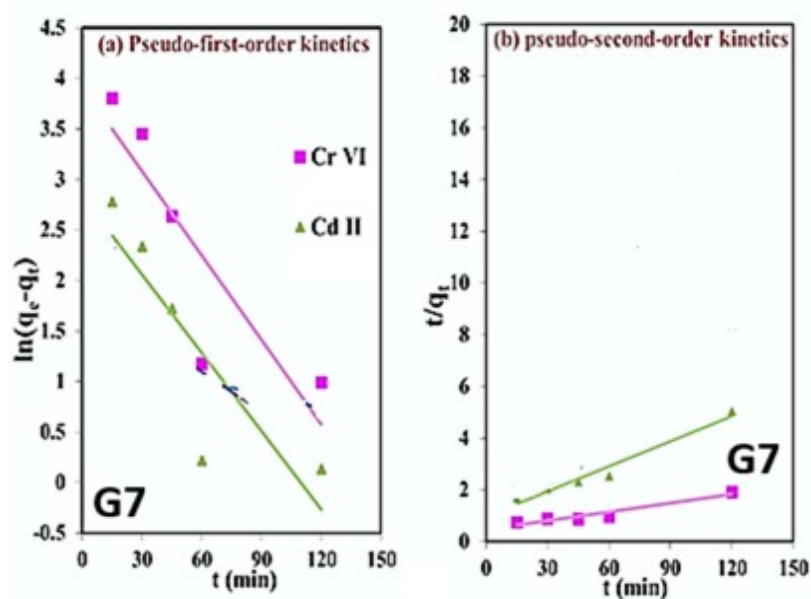

Fig. S1. (a) Pseudo-first-order and (b) pseudo-second-order kinetic plots for Cr(VI) and Cd(II) adsorption onto G7 (Conditions:  $C_0 = 50$  mg/L, pH 6.0, adsorbent dose = 10 mg).

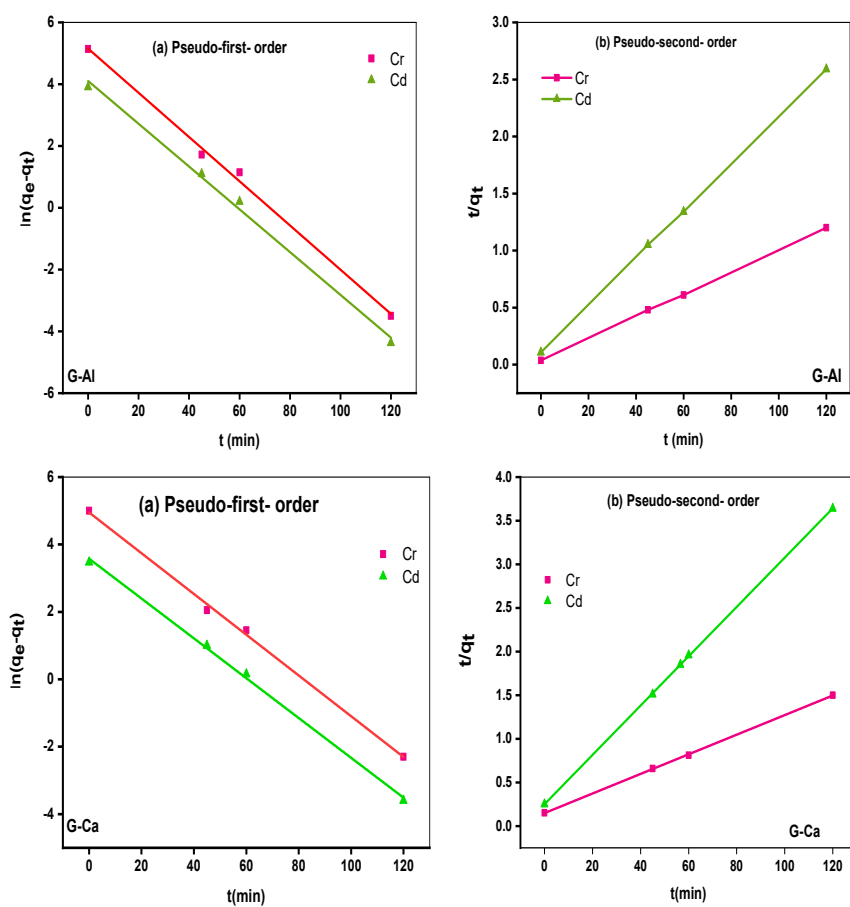

Fig.S2. (a) Pseudo-first-order and (b) pseudo-second-order kinetic plots for the adsorption of Cr(VI) and Cd(II) onto G-Al, and G-Ca adsorbent (Conditions: 50 mg/L initial concentration, pH 6.0, 10 mg adsorbent dose).

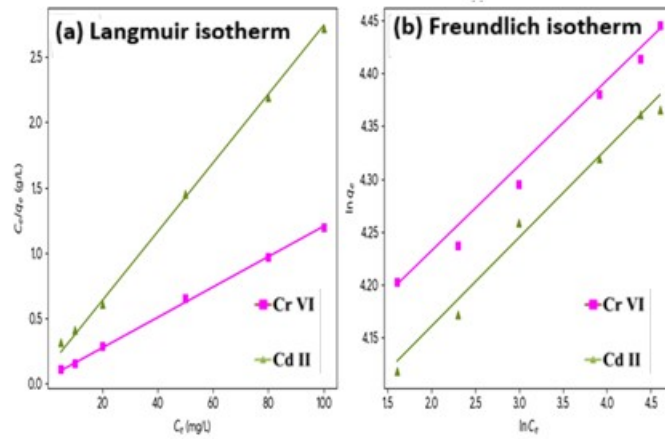

Fig. S3. Adsorption isotherms for Cr(VI) and Cd(II) onto G-Al adsorbent: (a) Langmuir model) and (b) Freundlich model (Conditions: Adsorbent dose = 10 mg, pH = 6.0, Temperature = 25°C).
